# Supplementary material for: MACv2-SP: a parameterization of anthropogenic aerosol optical properties and an associated Twomey effect for use in CMIP6
Source: Copernicus journal article supplement (doi:10.5194/gmd-10-433-2017), 2017-02-01
Supplement: Supplementary file 1 [file gmd-10-433-2017-supplement.zip]

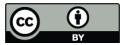

## *Supplement of*

# **MACv2-SP: a parameterization of anthropogenic aerosol optical properties and an associated Twomey effect for use in CMIP6**

**B. Stevens et al.**

*Correspondence to:* Bjorn Stevens ([bjorn.stevens@mpimet.mpg.de](mailto:bjorn.stevens@mpimet.mpg.de))

- [gmd-10-433-2017-supplement-title-page.pdf](#)
- MACv2-SP\_v1
  - MACv2.0-SP\_v1.nc
  - README
  - mo\_simple\_plumes\_v1.f90
  - orography\_T63.nc
  - sp\_driver\_v1.f90
  - sp\_make\_data\_v1.ncl

The copyright of individual parts of the supplement might differ from the CC-BY 3.0 licence.
